# Supplementary material
Source: publisher figshare collection journal article supplement (https://diabetesjournals.figshare.com/articles/dataset/_/19799632)
Supplement: Supplementary file 1 [file 1]

## Checklist for Reporting Human Islet Preparations Used in Research

Adapted from Hart NJ, Powers AC (2018) Progress, challenges, and suggestions for using human islets to understand islet biology and human diabetes. Diabetologia <https://doi.org/10.1007/s00125-018-4772-2>.

|                                                                                                                                                                                                                                                                                                                                     |                                                   |
|-------------------------------------------------------------------------------------------------------------------------------------------------------------------------------------------------------------------------------------------------------------------------------------------------------------------------------------|---------------------------------------------------|
| <b>Manuscript DOI:</b> <a href="https://doi.org/10.2337/db21-1066">https://doi.org/10.2337/db21-1066</a>                                                                                                                                                                                                                            |                                                   |
| <b>Title:</b> The p66 <sup>Shc</sup> protein mediates insulin resistance in pancreatic beta-cells under lipotoxic conditions                                                                                                                                                                                                        |                                                   |
| <b>Author list:</b> Giuseppina Biondi, Nicola Marrano, Lucia Dipaola, Anna Borrelli, <b>Martina Rella</b> , Rossella D'Oria, Valentina Annamaria Genchi, Cristina Caccioppoli, Immacolata Porreca, Angelo Cignarelli, Sebastio Perrini, Piero Marchetti, Leonardo Vincenti, Luigi Laviola, Francesco Giorgino, Annalisa Natalicchio |                                                   |
| <b>Corresponding author:</b> Francesco Giorgino                                                                                                                                                                                                                                                                                     | <b>Email address:</b> francesco.giorgino@uniba.it |

| Islet preparation              | 1          | 2          | 3          | 4          | 5          | 6          | 7          | 8          |
|--------------------------------|------------|------------|------------|------------|------------|------------|------------|------------|
| MANDATORY INFORMATION          |            |            |            |            |            |            |            |            |
| Unique identifier              | F65ND19.53 | M70ND20.20 | F55ND25.26 | M71ND22.46 | F67ND21.48 | F61ND20.00 | M77ND31.25 | M78ND26.99 |
| Donor age (years)              | 65         | 70         | 55         | 71         | 67         | 61         | 77         | 78         |
| Donor sex (M/F)                | F          | M          | F          | M          | F          | F          | M          | M          |
| Donor BMI (kg/m <sup>2</sup> ) | 19.53      | 20.20      | 25.26      | 22.46      | 21.48      | 20.00      | 31.25      | 26.99      |

|                                                                             |                                                                                   |                                                                                   |                                                                                   |                                                                                   |                                                                                   |                                                                                   |                                                                                   |                                                                                   |
|-----------------------------------------------------------------------------|-----------------------------------------------------------------------------------|-----------------------------------------------------------------------------------|-----------------------------------------------------------------------------------|-----------------------------------------------------------------------------------|-----------------------------------------------------------------------------------|-----------------------------------------------------------------------------------|-----------------------------------------------------------------------------------|-----------------------------------------------------------------------------------|
| Fasting glycemia (mg/dl)                                                    | 96                                                                                | 81                                                                                | 95                                                                                | 88                                                                                | 96                                                                                | 90                                                                                | 91                                                                                | 84                                                                                |
| Origin/source of islets <sup>b</sup>                                        | Bari                                                                              |
| Islet isolation centre                                                      | Department of<br>Emergency and<br>Organ<br>Transplantation-<br>University of Bari |
| Donor history of<br>diabetes? Yes/No                                        | No                                                                                |
| <b>If Yes, complete the next two lines if this information is available</b> |                                                                                   |                                                                                   |                                                                                   |                                                                                   |                                                                                   |                                                                                   |                                                                                   |                                                                                   |
| Diabetes duration (years)                                                   |                                                                                   |                                                                                   |                                                                                   |                                                                                   |                                                                                   |                                                                                   |                                                                                   |                                                                                   |
| Glucose-lowering therapy<br>at time of death <sup>c</sup>                   |                                                                                   |                                                                                   |                                                                                   |                                                                                   |                                                                                   |                                                                                   |                                                                                   |                                                                                   |

| RECOMMENDED INFORMATION |     |     |     |     |     |     |     |     |
|-------------------------|-----|-----|-----|-----|-----|-----|-----|-----|
| Donor cause of death    | N/A |
| Warm ischaemia time (h) |     |     |     |     |     |     |     |     |
| Cold ischaemia time (h) | <1  | <1  | <1  | <1  | <1  | <1  | <1  | <1  |

|                                                                                   |     |     |     |     |     |     |     |     |
|-----------------------------------------------------------------------------------|-----|-----|-----|-----|-----|-----|-----|-----|
| Estimated purity (%)                                                              | N/D |
| Estimated viability (%)                                                           |     |     |     |     |     |     |     |     |
| Total culture time (h) <sup>d</sup>                                               | 24  | 24  | 24  | 24  | 24  | 24  | 24  | 24  |
| Glucose-stimulated insulin secretion or other functional measurement <sup>e</sup> | N/D |
| Handpicked to purity? Yes/No                                                      | Yes |
| Additional notes                                                                  |     |     |     |     |     |     |     |     |

| Islet preparation     | 9          | 10         | 11         | 12              | 13              | 14         | 15              | 16         |
|-----------------------|------------|------------|------------|-----------------|-----------------|------------|-----------------|------------|
| MANDATORY INFORMATION |            |            |            |                 |                 |            |                 |            |
| Unique identifier     | F71ND30.47 | M57ND25.10 | F63ND28.28 | UPI_T2DSyst_304 | UPI_T2DSyst_266 | F66ND19.38 | UPI_T2DSyst_235 | M64ND21.80 |
| Donor age (years)     | 71         | 57         | 63         | 80              | 58              | 66         | 52              | 64         |

|                                                                             |                                                                                   |                                                                                   |                                                                                   |                                          |                                          |                                                                                   |                                          |                                                                                   |
|-----------------------------------------------------------------------------|-----------------------------------------------------------------------------------|-----------------------------------------------------------------------------------|-----------------------------------------------------------------------------------|------------------------------------------|------------------------------------------|-----------------------------------------------------------------------------------|------------------------------------------|-----------------------------------------------------------------------------------|
| Donor sex (M/F)                                                             | F                                                                                 | M                                                                                 | F                                                                                 | F                                        | F                                        | F                                                                                 | F                                        | M                                                                                 |
| Donor BMI (kg/m <sup>2</sup> )                                              | 30.47                                                                             | 25.10                                                                             | 28.28                                                                             | 24.80                                    | 25.80                                    | 19.38                                                                             | 25.40                                    | 21.80                                                                             |
| Fasting glycemia (mg/dl)                                                    | 126                                                                               | 116                                                                               | 86                                                                                | 122                                      | 104                                      | 82                                                                                | 85                                       | 162                                                                               |
| Origin/source of islets <sup>b</sup>                                        | Bari                                                                              | Bari                                                                              | Bari                                                                              | Pisa                                     | Pisa                                     | Bari                                                                              | Pisa                                     | Bari                                                                              |
| Islet isolation centre                                                      | Department of<br>Emergency and<br>Organ<br>Transplantation-<br>University of Bari | Department of<br>Emergency and<br>Organ<br>Transplantation-<br>University of Bari | Department of<br>Emergency and<br>Organ<br>Transplantation-<br>University of Bari | Islet Laboratory –<br>University of Pisa | Islet Laboratory –<br>University of Pisa | Department of<br>Emergency and<br>Organ<br>Transplantation-<br>University of Bari | Islet Laboratory –<br>University of Pisa | Department of<br>Emergency and<br>Organ<br>Transplantation-<br>University of Bari |
| Donor history of<br>diabetes? Yes/No                                        | No                                                                                | No                                                                                | No                                                                                | No                                       | No                                       | No                                                                                | No                                       | No                                                                                |
| <b>If Yes, complete the next two lines if this information is available</b> |                                                                                   |                                                                                   |                                                                                   |                                          |                                          |                                                                                   |                                          |                                                                                   |
| Diabetes duration (years)                                                   |                                                                                   |                                                                                   |                                                                                   |                                          |                                          |                                                                                   |                                          |                                                                                   |
| Glucose-lowering therapy<br>at time of death <sup>c</sup>                   |                                                                                   |                                                                                   |                                                                                   |                                          |                                          |                                                                                   |                                          |                                                                                   |

| RECOMMENDED INFORMATION |     |     |     |                        |                               |     |                  |     |
|-------------------------|-----|-----|-----|------------------------|-------------------------------|-----|------------------|-----|
| Donor cause of death    | N/A | N/A | N/A | Cerebral<br>hemorrhage | Post-anoxic<br>encephalopathy | N/A | Ischaemic stroke | N/A |

|                                                                                   |     |     |     |                                    |                                    |     |                                    |     |
|-----------------------------------------------------------------------------------|-----|-----|-----|------------------------------------|------------------------------------|-----|------------------------------------|-----|
| Warm ischaemia time (h)                                                           |     |     |     |                                    |                                    |     |                                    |     |
| Cold ischaemia time (h)                                                           | <1  | <1  | <1  | 36                                 | 7                                  | <1  | 15                                 | <1  |
| Estimated purity (%)                                                              | N/D | N/D | N/D | 90                                 | 60                                 | N/D | 60                                 | N/D |
| Estimated viability (%)                                                           |     |     |     |                                    |                                    |     |                                    |     |
| Total culture time (h) <sup>d</sup>                                               | 24  | 24  | 24  | 72                                 | 72                                 | 24  | 72                                 | 24  |
| Glucose-stimulated insulin secretion or other functional measurement <sup>e</sup> | N/D | N/D | N/D | Yes, evaluated by batch incubation | Yes, evaluated by batch incubation | N/D | Yes, evaluated by batch incubation | N/D |
| Handpicked to purity? Yes/No                                                      | Yes | Yes | Yes | No                                 | No                                 | Yes | No                                 | Yes |
| Additional notes                                                                  |     |     |     |                                    |                                    |     |                                    |     |

|                       |    |  |  |  |  |  |  |  |
|-----------------------|----|--|--|--|--|--|--|--|
| Islet preparation     | 17 |  |  |  |  |  |  |  |
| MANDATORY INFORMATION |    |  |  |  |  |  |  |  |

|                                                                             |                                                                                   |  |  |  |  |  |  |  |
|-----------------------------------------------------------------------------|-----------------------------------------------------------------------------------|--|--|--|--|--|--|--|
| Unique identifier                                                           | M68ND24.71                                                                        |  |  |  |  |  |  |  |
| Donor age (years)                                                           | 68                                                                                |  |  |  |  |  |  |  |
| Donor sex (M/F)                                                             | M                                                                                 |  |  |  |  |  |  |  |
| Donor BMI (kg/m <sup>2</sup> )                                              | 24.71                                                                             |  |  |  |  |  |  |  |
| Fasting glycemia (mg/dl)                                                    | 81                                                                                |  |  |  |  |  |  |  |
| Origin/source of islets <sup>b</sup>                                        | Bari                                                                              |  |  |  |  |  |  |  |
| Islet isolation centre                                                      | Department of<br>Emergency and<br>Organ<br>Transplantation-<br>University of Bari |  |  |  |  |  |  |  |
| Donor history of<br>diabetes? Yes/No                                        | No                                                                                |  |  |  |  |  |  |  |
| <b>If Yes, complete the next two lines if this information is available</b> |                                                                                   |  |  |  |  |  |  |  |
| Diabetes duration (years)                                                   |                                                                                   |  |  |  |  |  |  |  |
| Glucose-lowering therapy<br>at time of death <sup>c</sup>                   |                                                                                   |  |  |  |  |  |  |  |

| RECOMMENDED INFORMATION                                                           |     |  |  |  |  |  |  |  |
|-----------------------------------------------------------------------------------|-----|--|--|--|--|--|--|--|
| Donor cause of death                                                              | N/A |  |  |  |  |  |  |  |
| Warm ischaemia time (h)                                                           |     |  |  |  |  |  |  |  |
| Cold ischaemia time (h)                                                           | <1  |  |  |  |  |  |  |  |
| Estimated purity (%)                                                              | N/D |  |  |  |  |  |  |  |
| Estimated viability (%)                                                           |     |  |  |  |  |  |  |  |
| Total culture time (h) <sup>d</sup>                                               | 24  |  |  |  |  |  |  |  |
| Glucose-stimulated insulin secretion or other functional measurement <sup>e</sup> | N/D |  |  |  |  |  |  |  |
| Handpicked to purity?<br>Yes/No                                                   | Yes |  |  |  |  |  |  |  |
| Additional notes                                                                  |     |  |  |  |  |  |  |  |
